# Supplementary material for: BRCA-mutated gastric adenocarcinomas are associated with chromosomal instability and responsiveness to platinum-based chemotherapy
Source: PubMed Central journal article supplement — J Pathol Transl Med. 2023 Nov 14;57(6):323–31. doi: 10.4132/jptm.2023.10.22 (PMC10660362; doi:10.4132/jptm.2023.10.22), 2023-11-14
Supplement: jptm-2023-10-22-Supplementary-Fig-S1.pdf [file jptm-2023-10-22-Supplementary-Fig-S1.pdf]

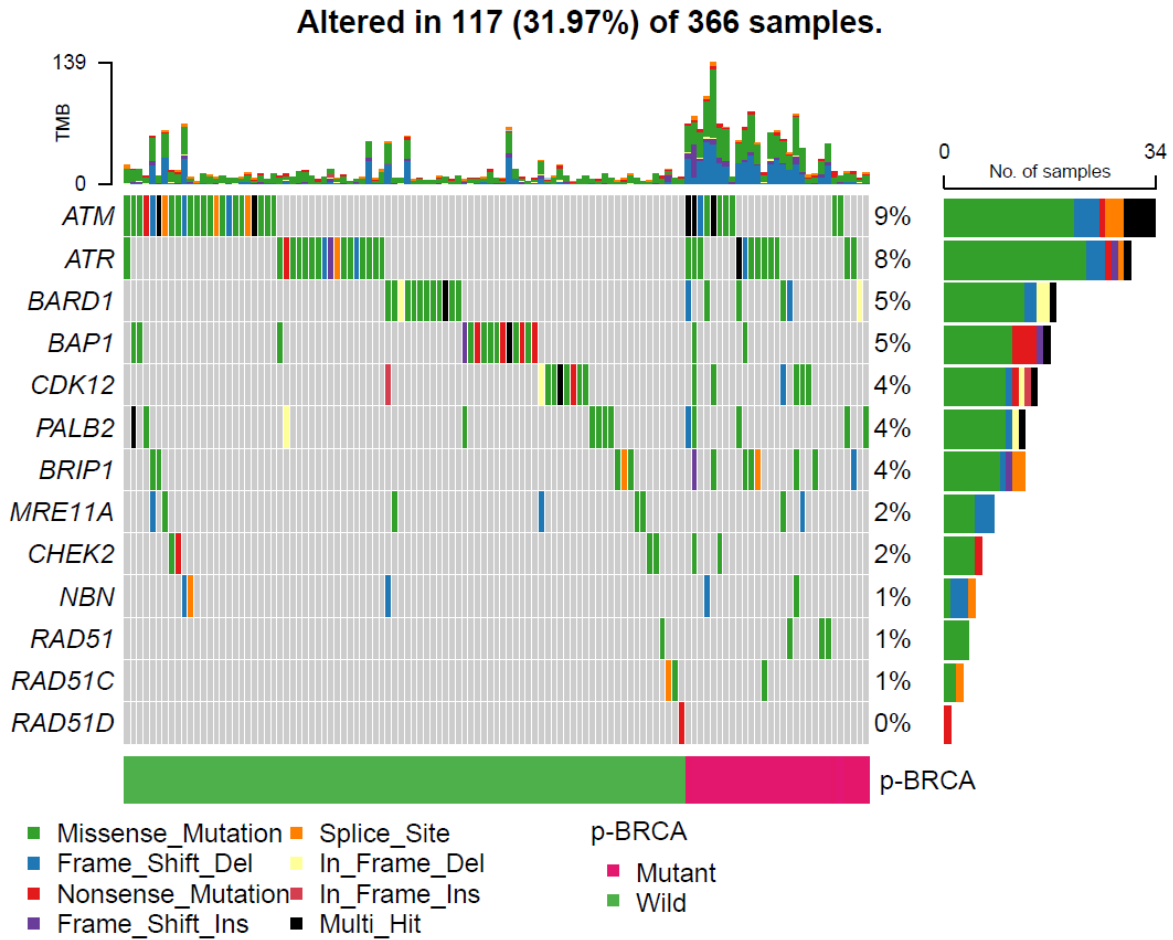

**Supplementary Fig. S1.** Genetic alteration status of the 13 non-BRCA homologous recombination repair (HRR)–related genes in gastric cancer samples. Those genes are mutated in 29.2% of *BRCA* wild-type cases and in 44.6% of pathogenic *BRCA* mutant cases.
