# Supplementary material for: BRCA-mutated gastric adenocarcinomas are associated with chromosomal instability and responsiveness to platinum-based chemotherapy
Source: PubMed Central journal article supplement — J Pathol Transl Med. 2023 Nov 14;57(6):323–31. doi: 10.4132/jptm.2023.10.22 (PMC10660362; doi:10.4132/jptm.2023.10.22), 2023-11-14
Supplement: jptm-2023-10-22-Supplementary-Fig-S2.pdf [file jptm-2023-10-22-Supplementary-Fig-S2.pdf]

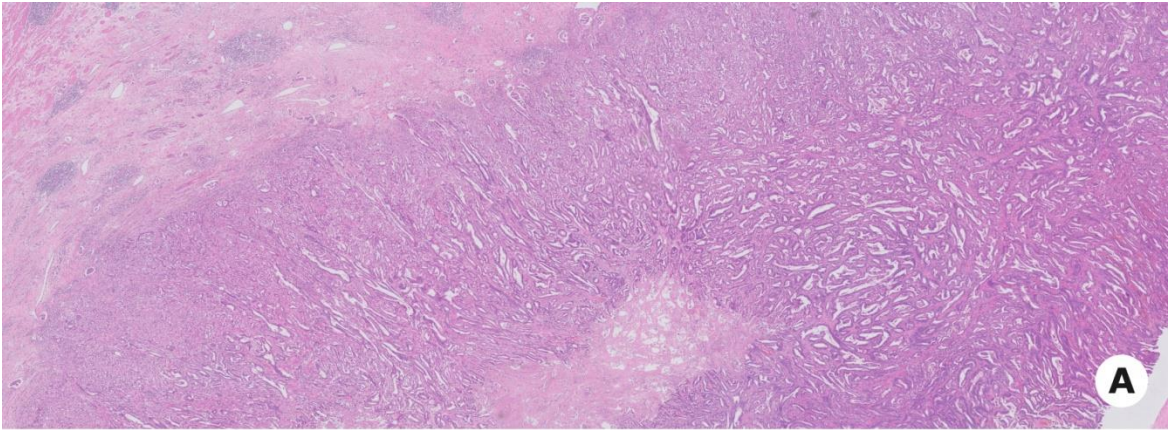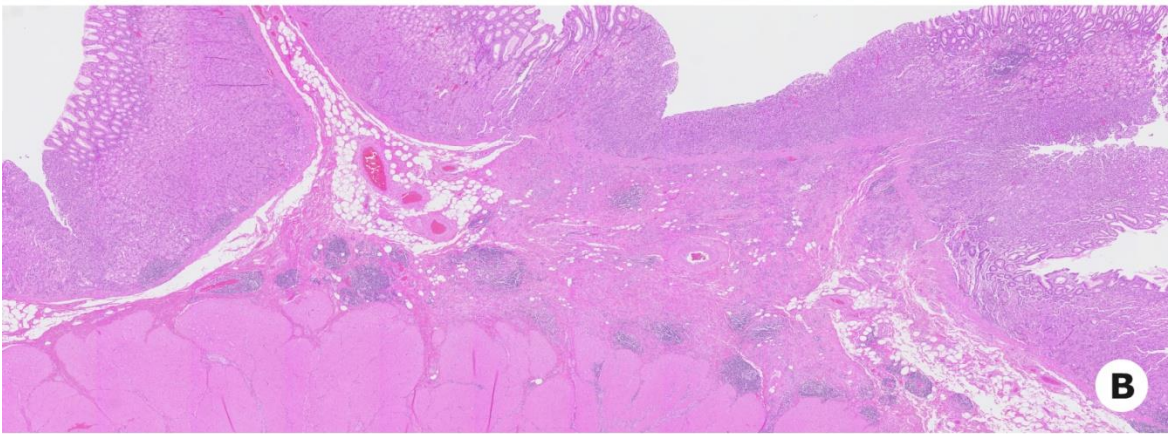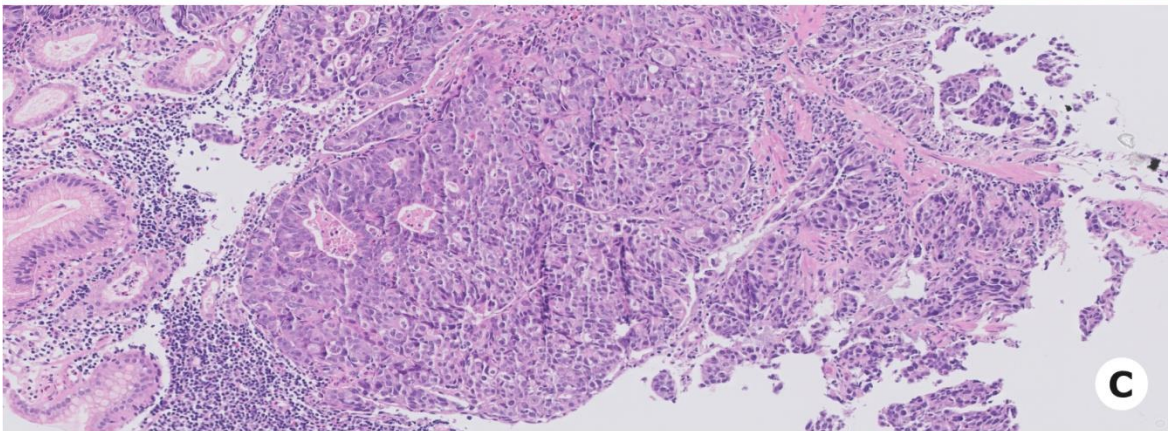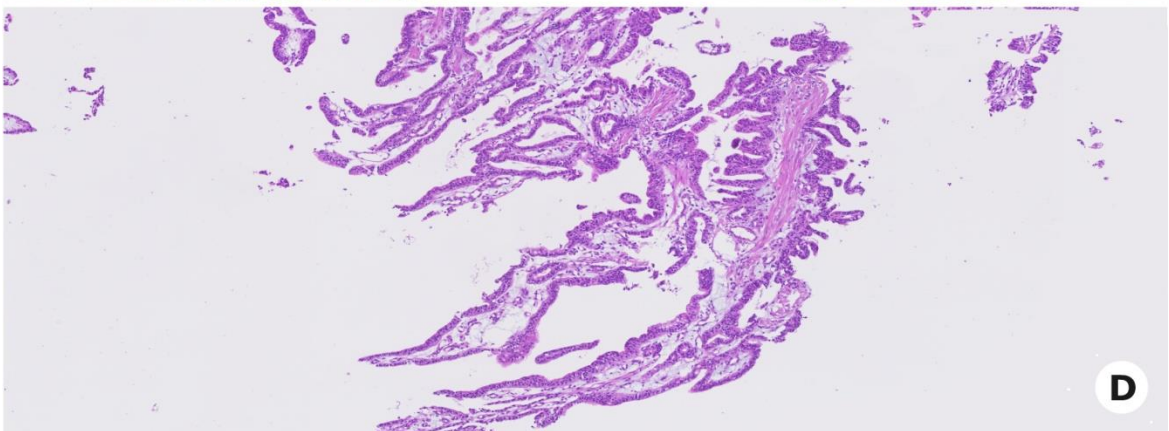

**Supplementary Fig. S2.** Representative histologic pictures of gastric carcinomas harboring p-BRCA mutation plus LOH. (A) This tumor shows an expansile tumor border and central necrosis. (B) Peritumoral Crohn-like lymphoid aggregates are observed in deep submucosa. (C) Solid and partly cribriform pattern is seen. (D) Papillary architecture is demonstrated. p-BRCA, pathogenic or likely pathogenic mutations involving *BRCA1* or *BRCA2*; LOH, loss of heterozygosity.
