# Supplementary material for: BRCA-mutated gastric adenocarcinomas are associated with chromosomal instability and responsiveness to platinum-based chemotherapy
Source: PubMed Central journal article supplement — J Pathol Transl Med. 2023 Nov 14;57(6):323–31. doi: 10.4132/jptm.2023.10.22 (PMC10660362; doi:10.4132/jptm.2023.10.22), 2023-11-14
Supplement: jptm-2023-10-22-Supplementary-Table-S2.pdf [file jptm-2023-10-22-Supplementary-Table-S2.pdf]

**Supplementary Table S2.** Response to platinum-based chemotherapy according to p-BRCA mutation in tumor

tissue

| Response            | p-BRCA mutation |           | p-value |
|---------------------|-----------------|-----------|---------|
|                     | Yes             | No        |         |
| Complete response   | 2 (5.0)         | 5 (3.3)   | .833    |
| Partial response    | 23 (57.5)       | 86 (57.3) |         |
| Stable disease      | 12 (30.0)       | 52 (34.7) |         |
| Progressive disease | 3 (7.5)         | 7 (4.7)   |         |
| Total               | 40              | 150       |         |

Values are presented as number (%).
