# Supplementary material for: BRCA-mutated gastric adenocarcinomas are associated with chromosomal instability and responsiveness to platinum-based chemotherapy
Source: PubMed Central journal article supplement — J Pathol Transl Med. 2023 Nov 14;57(6):323–31. doi: 10.4132/jptm.2023.10.22 (PMC10660362; doi:10.4132/jptm.2023.10.22), 2023-11-14
Supplement: jptm-2023-10-22-Supplementary-Table-S3.pdf [file jptm-2023-10-22-Supplementary-Table-S3.pdf]

**Supplementary Table S3.** Response to platinum-based chemotherapy according to p-BRCA mutations and LOH within MSS subgroup

| Response            | p-BRCA mutations and LOH status within MSS subgroup |          |           | p-value           |
|---------------------|-----------------------------------------------------|----------|-----------|-------------------|
|                     | LOH+                                                | LOH-     | Wild      |                   |
| Complete response   | 1 (6.3)                                             | 0        | 5 (3.5)   | .005 <sup>a</sup> |
| Partial response    | 15 (93.8)                                           | 6 (50.0) | 82 (57.7) |                   |
| Stable disease      | 0                                                   | 5 (41.7) | 48 (33.8) |                   |
| Progressive disease | 0                                                   | 1 (8.3)  | 7 (4.9)   |                   |
| Total               | 16                                                  | 12       | 142       |                   |

Values are presented as number (%).

p-BRCA, pathogenic or likely pathogenic mutations involving *BRCA1* or *BRCA2*; LOH, loss of heterozygosity; MSS, microsatellite stable.

<sup>a</sup>Kruskal-Wallis test.
